# Supplementary material for: Cathepsin S are involved in human carotid atherosclerotic disease progression, mainly by mediating phagosomes: bioinformatics and in vivo and vitro experiments
Source: PeerJ journal article supplement (doi:10.7717/peerj.12846), 2022-02-08
Supplement: Fig5-raw_data.pdf [file Fig5-raw_data.pdf]

# Fig.5 data

| G | MN | ML | Mc    | Mp   | Nc   | Np   |
|---|----|----|-------|------|------|------|
| 1 | 0  | 16 | 0.79  | 11.6 | 1.47 | 83.9 |
| 1 | 1  | 13 | 0.29  | 8.7  | 1.01 | 62.2 |
| 1 | 2  | 12 | 0.22  | 11.6 | 0.98 | 54.7 |
| 1 | 3  | 17 | 0.2   | 5.3  | 0.72 | 49.6 |
| 1 | 2  | 18 | 0.19  | 7.9  | 0.69 | 42.1 |
| 1 | 1  | 15 | 0.12  | 11   | 0.68 | 41.5 |
| 1 |    |    | 0.11  | 7.5  | 0.65 | 37.3 |
| 1 |    |    | 0.1   | 5.2  | 0.64 | 34.8 |
| 1 |    |    | 0.09  | 3.8  | 0.61 | 33.9 |
| 1 |    |    | 0.09  | 7.8  | 0.59 | 29.9 |
| 1 |    |    | 0.08  | 5.1  | 0.56 | 29.7 |
| 1 |    |    | 0.07  | 4.3  | 0.35 | 29.1 |
| 1 |    |    | 0.06  | 3.5  | 0.31 | 26.9 |
| 1 |    |    | 0.05  | 4.4  | 0.28 | 19.3 |
| 1 |    |    | 0.04  | 6.1  | 0.26 | 18.7 |
| 1 |    |    | 0.04  | 5.1  | 0.26 | 17.3 |
| 1 |    |    | 0.04  | 7    | 0.24 | 16.3 |
| 1 |    |    | 0.03  | 5.2  | 0.22 | 16.2 |
| 2 | 1  | 5  | 0.04  | 0.8  | 0.05 | 10.2 |
| 2 | 0  | 6  | 0.03  | 1.7  | 0.07 | 13.8 |
| 2 | 2  | 7  | 0.03  | 0.8  | 0.09 | 14.6 |
| 2 | 1  | 8  | 0.02  | 0.8  | 0.09 | 18.4 |
| 2 | 0  | 5  | 0.02  | 0.7  | 0.1  | 18.5 |
| 2 | 2  | 6  | 0.02  | 0.8  | 0.17 | 19.9 |
| 2 |    |    | 0.01  | 0.7  | 0.21 | 19.9 |
| 2 |    |    | 0.001 | 0.8  | 0.43 | 20.4 |
| 2 |    |    | 0.002 | 0.7  | 0.47 | 22.3 |
| 2 |    |    | 0.003 | 0.8  | 0.48 | 22.4 |

G:group(1:CatS<sup>+/+</sup>;2:CatS<sup>-/-</sup>)

MN:CD68 Non-ligation

ML:CD68 Ligation

Mc:Monocyte Count

Mp:monocyte Percentage

Nc:Neutrophil Count

Np:Neutrophil Percentage

# Statistical description

|    | G       | N  | mean      | SD         | SEM       |
|----|---------|----|-----------|------------|-----------|
| MN | CatS+/+ | 6  | 1.5       | 1.0488088  | 0.4281744 |
|    | CatS-/- | 6  | 1         | 0.8944272  | 0.3651484 |
| ML | CatS+/+ | 6  | 15.166667 | 2.3166067  | 0.9457507 |
|    | CatS-/- | 6  | 6.166667  | 1.1690452  | 0.4772607 |
| Mc | CatS+/+ | 18 | 0.145     | 0.1765769  | 0.0416196 |
|    | CatS-/- | 10 | 0.0176    | 0.0134015  | 0.0042379 |
| Mp | CatS+/+ | 18 | 6.727778  | 2.6067346  | 0.6144132 |
|    | CatS-/- | 10 | 0.86      | 0.2988868  | 0.0945163 |
| Nc | CatS+/+ | 18 | 0.584444  | 0.3302445  | 0.0778394 |
|    | CatS-/- | 10 | 0.216     | 0.1751951  | 0.0554016 |
| Np | CatS+/+ | 18 | 35.744444 | 17.9945162 | 4.2413482 |
|    | CatS-/- | 10 | 18.04     | 3.9618178  | 1.2528368 |

# Normality detection and p-value acquisition

## Normality test

Kolmogorov-Smirnov<sup>a</sup>

|    | statistic | df | Sig.  |
|----|-----------|----|-------|
| MN | 0.198     | 12 | .200* |
| ML | 0.203     | 12 | 0.187 |
| Mc | 0.255     | 12 | 0.03  |
| Mp | 0.267     | 12 | 0.018 |
| Nc | 0.26      | 12 | 0.024 |
| Np | 0.25      | 12 | 0.036 |

a. Lilliefors Significant level correction

\*. This is the lower limit of true significance.

## Student's t-test

|    |                                    | F     | Sig.  | t     | df    | Sig.(both sides) |
|----|------------------------------------|-------|-------|-------|-------|------------------|
| MN | Assuming the variance is equal     | 0.313 | 0.588 | 0.889 | 10    | 0.395            |
|    | Assuming the variance is not equal |       |       | 0.889 | 9.757 | 0.396            |
| ML | Assuming the variance is equal     | 3.055 | 0.111 | 8.496 | 10    | 0                |
|    | Assuming the variance is not equal |       |       | 8.496 | 7.391 | 0                |

## Mann-Whitney U test

|                  | Mc     | Mp    | Nc     | Np     |
|------------------|--------|-------|--------|--------|
| Mann-Whitney U   | 3.5    | 0     | 21     | 31     |
| Wilcoxon W       | 58.5   | 55    | 76     | 86     |
| Z                | -4.158 | -4.34 | -3.309 | -2.829 |
| Sig.(both sides) | 0      | 0     | 0.001  | 0.005  |
