# Supplementary material for: Cathepsin S are involved in human carotid atherosclerotic disease progression, mainly by mediating phagosomes: bioinformatics and in vivo and vitro experiments
Source: PeerJ. 2022 Feb 8;10:e12846. doi: 10.7717/peerj.12846 (PMC8833225; doi:10.7717/peerj.12846)
Supplement: Supplemental Information 3 [file peerj-10-12846-s003.xlsx]

## Sheet: Sheet1
G	MN	ML	Mc	Mp	Nc	Np
1	0	16	0.79	11.6	1.47	83.9
1	1	13	0.29	8.7	1.01	62.2
1	2	12	0.22	11.6	0.98	54.7
1	3	17	0.2	5.3	0.72	49.6
1	2	18	0.19	7.9	0.69	42.1
1	1	15	0.12	11	0.68	41.5
1			0.11	7.5	0.65	37.3
1			0.1	5.2	0.64	34.8
1			0.09	3.8	0.61	33.9
1			0.09	7.8	0.59	29.9
1			0.08	5.1	0.56	29.7
1			0.07	4.3	0.35	29.1
1			0.06	3.5	0.31	26.9
1			0.05	4.4	0.28	19.3
1			0.04	6.1	0.26	18.7
1			0.04	5.1	0.26	17.3
1			0.04	7	0.24	16.3
1			0.03	5.2	0.22	16.2
2	1	5	0.04	0.8	0.05	10.2
2	0	6	0.03	1.7	0.07	13.8
2	2	7	0.03	0.8	0.09	14.6
2	1	8	0.02	0.8	0.09	18.4
2	0	5	0.02	0.7	0.1	18.5
2	2	6	0.02	0.8	0.17	19.9
2			0.01	0.7	0.21	19.9
2			0.001	0.8	0.43	20.4
2			0.002	0.7	0.47	22.3
2			0.003	0.8	0.48	22.4
G:group(1:CatS+/+;2:CatS-/-)
MN:CD68 Non-ligation (Fig.5F)
ML:CD68 Ligation (Fig.5G)
Mc:Monocyte Count (Fig.5A)
Mp:monocyte Percentage (Fig.5B)
Nc:Neutrophil Count (Fig.5C)
Np:Neutrophil Percentage (Fig.5D)
