# Supplementary material for: Cathepsin S are involved in human carotid atherosclerotic disease progression, mainly by mediating phagosomes: bioinformatics and in vivo and vitro experiments
Source: PeerJ. 2022 Feb 8;10:e12846. doi: 10.7717/peerj.12846 (PMC8833225; doi:10.7717/peerj.12846)
Supplement: Supplemental Information 4 [file peerj-10-12846-s004.xls]

## Sheet: Sheet1
group	Cathepsin S	gp91phox	p22phox	p47phox
0	4.6512	3.09577	2.8263	2.10671
0	12.732	10.0278	4.27093	4.88693
0	8.88652	8.17703	3.03183	5.15254
0	6.67819	7.30261	4.39854	8.55349
0	2.50783	15.6291	2.19585	10.2479
1	29.6007	40.2224	19.2734	16.2742
1	25.5169	52.223	13.2371	24.6272
1	36.7357	37.1568	10.5866	18.5575
1	21.6684	46.0128	9.73094	14.8177
1	27.2449	31.4679	10.8861	12.0094
1	23.1868	49.9177	17.2688	14.4678
1	31.1972	34.6062	11.6644	22.7537
1	34.2868	43.6471	18.5897	26.6406
0：LPS(-);1:LPS(+)
